# Supplementary material for: Short-Term Outcomes of Intravitreal Faricimab Injection for Diabetic Macular Edema
Source: Medicina (Kaunas). 2023 Mar 27;59(4):665. doi: 10.3390/medicina59040665 (PMC10142035; doi:10.3390/medicina59040665)
Supplement: Supplementary file 1 [file medicina-59-00665-s001.zip › medicina-2274975-supplementary.pdf]

## **Figure S1**

### **The detailed clinical courses of all cases treated with intravitreal faricimab injection**

#### **Abbreviations**

- BCVA: best-corrected visual acuity
- IVF: intravitreal faricimab injection
- IVA: intravitreal aflibercept injection
- IVBr: intravitreal brolucizumab injection
- STTA: sub-Tenon's injection of triamcinolone acetonide
- PPV: pars plana vitrectomy



| Case   | Age range (years) | Sex  | Type of therapy | Lens status | History of vitrectomy |
|--------|-------------------|------|-----------------|-------------|-----------------------|
| Case 2 | 60s               | male | Switch          | IOL         | no                    |

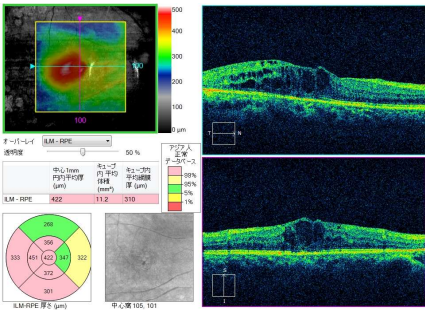

|           |       |
|-----------|-------|
| Baseline  |       |
| BCVA      | 20/32 |
| Treatment | IVF   |

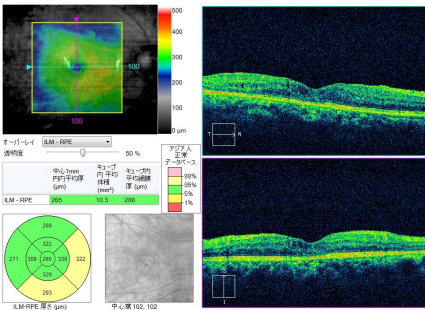

|           |       |
|-----------|-------|
| 1 month   |       |
| BCVA      | 20/32 |
| Treatment | -     |

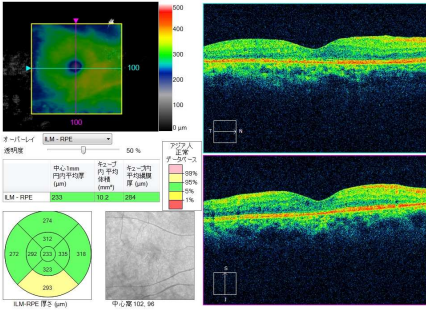

|           |       |
|-----------|-------|
| 2 months  |       |
| BCVA      | 20/25 |
| Treatment | -     |

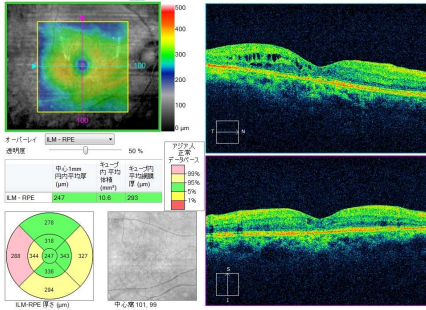

|           |       |
|-----------|-------|
| 3 months  |       |
| BCVA      | 20/25 |
| Treatment | IVF   |

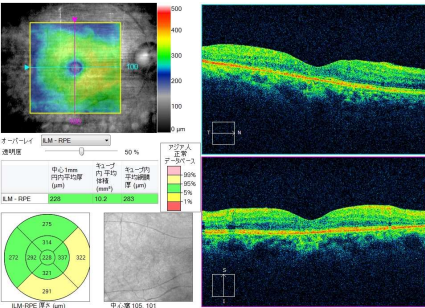

|           |       |
|-----------|-------|
| 4 months  |       |
| BCVA      | 20/25 |
| Treatment | -     |

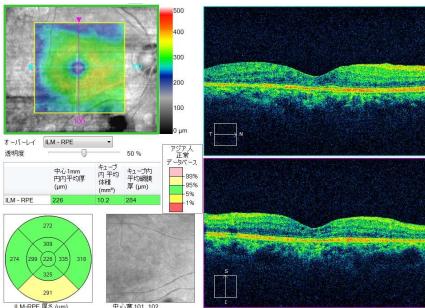

|           |   |
|-----------|---|
| 5 months  |   |
| BCVA      | - |
| Treatment | - |

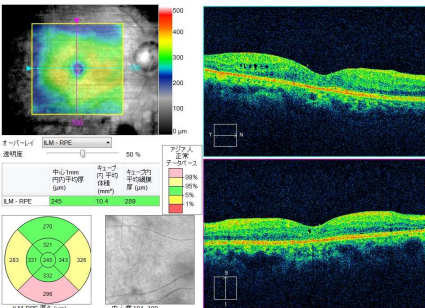

|           |       |
|-----------|-------|
| 6 months  |       |
| BCVA      | 20/25 |
| Treatment | -     |

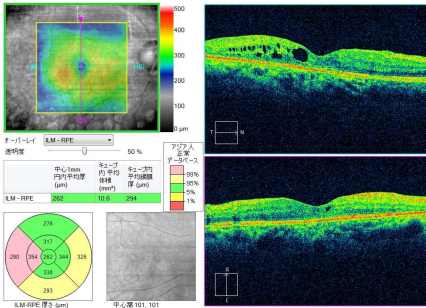

|           |       |
|-----------|-------|
| 7 months  |       |
| BCVA      | 20/25 |
| Treatment | -     |

| Case   | Age range (years) | Sex  | Type of therapy | Lens status | History of vitrectomy |
|--------|-------------------|------|-----------------|-------------|-----------------------|
| Case 3 | 60s               | male | Treatment-naïve | phakic      | no                    |

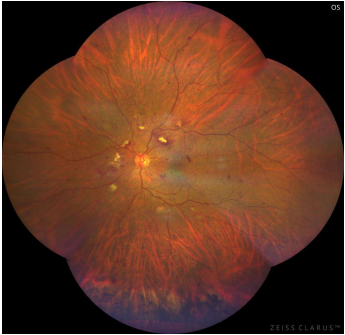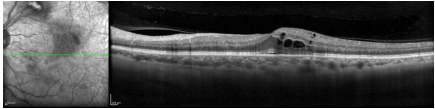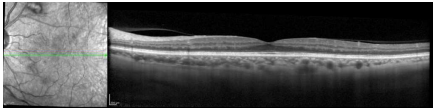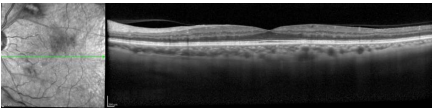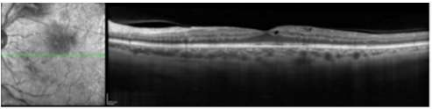

| Baseline  |       |
|-----------|-------|
| BCVA      | 20/32 |
| Treatment | IVF   |

| 1 month   |   |
|-----------|---|
| BCVA      | - |
| Treatment | - |

| 2 months  |       |
|-----------|-------|
| BCVA      | 20/20 |
| Treatment | -     |

| 3 months  |       |
|-----------|-------|
| BCVA      | 20/16 |
| Treatment | IVF   |

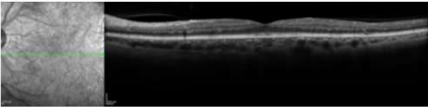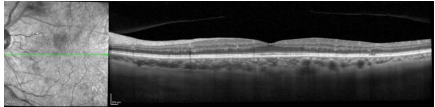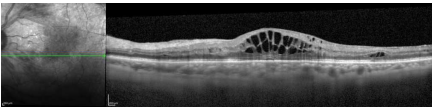

| 4 months  |       |
|-----------|-------|
| BCVA      | 20/20 |
| Treatment | -     |

| 5 months  |       |
|-----------|-------|
| BCVA      | 20/16 |
| Treatment | -     |

| 6 months  |   |
|-----------|---|
| BCVA      | - |
| Treatment | - |

| 7 months  |       |
|-----------|-------|
| BCVA      | 20/50 |
| Treatment | IVF   |

| Case   | Age range (years) | Sex  | Type of therapy | Lens status | History of vitrectomy |
|--------|-------------------|------|-----------------|-------------|-----------------------|
| Case 4 | 60s               | male | Treatment-naïve | phakic      | no                    |

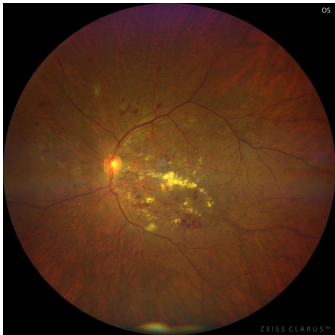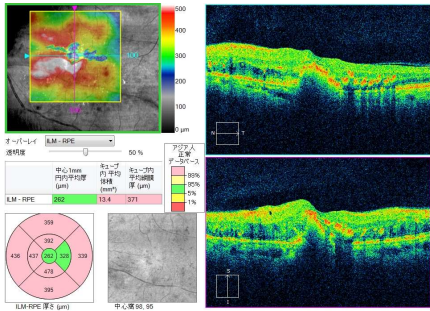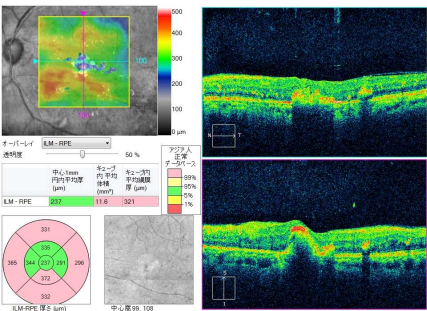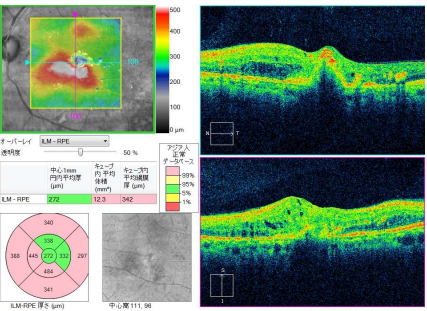

| Baseline  |        |
|-----------|--------|
| BCVA      | 20/160 |
| Treatment | IVF    |

| 1 month   |        |
|-----------|--------|
| BCVA      | 20/200 |
| Treatment | -      |

| 2 months  |     |
|-----------|-----|
| BCVA      | -   |
| Treatment | IVF |

| 3 months  |   |
|-----------|---|
| BCVA      | - |
| Treatment | - |

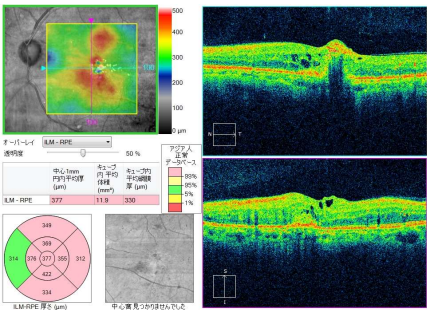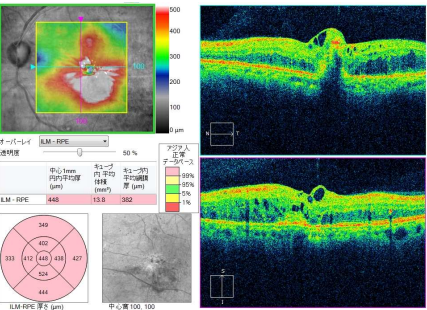

| 4 months  |   |
|-----------|---|
| BCVA      | - |
| Treatment | - |

| 5 months  |   |
|-----------|---|
| BCVA      | - |
| Treatment | - |

| 6 months  |        |
|-----------|--------|
| BCVA      | 20/200 |
| Treatment | -      |

| 7 months  |        |
|-----------|--------|
| BCVA      | 20/200 |
| Treatment | IVF    |

| Case   | Age range (years) | Sex  | Type of therapy | Lens status | History of vitrectomy |
|--------|-------------------|------|-----------------|-------------|-----------------------|
| Case 5 | 50s               | male | Treatment-naïve | phakic      | no                    |

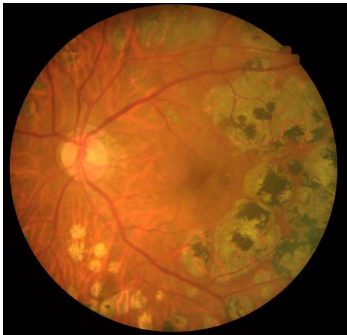

| Baseline  |       |
|-----------|-------|
| BCVA      | 20/20 |
| Treatment | IVF   |

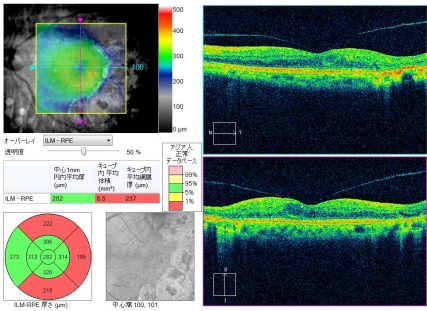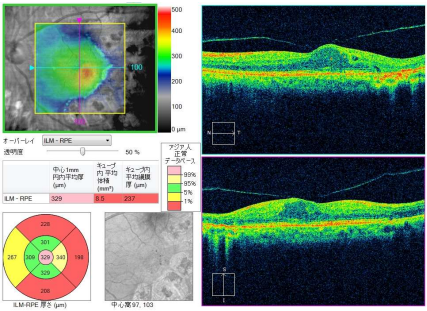

| 1 month   |       |
|-----------|-------|
| BCVA      | 20/25 |
| Treatment | IVBr  |

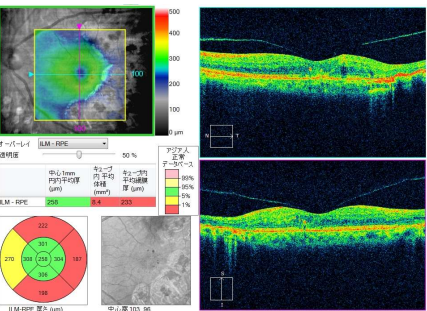

| 2 months  |       |
|-----------|-------|
| BCVA      | 20/25 |
| Treatment | -     |

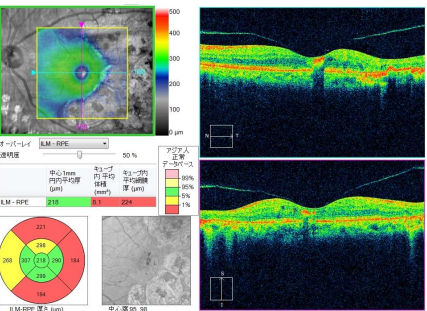

| 3 months  |       |
|-----------|-------|
| BCVA      | 20/25 |
| Treatment | -     |

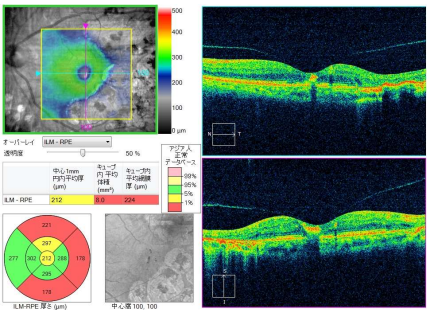

| 4 months  |   |
|-----------|---|
| BCVA      | - |
| Treatment | - |

| 5 months  |       |
|-----------|-------|
| BCVA      | 20/20 |
| Treatment | -     |

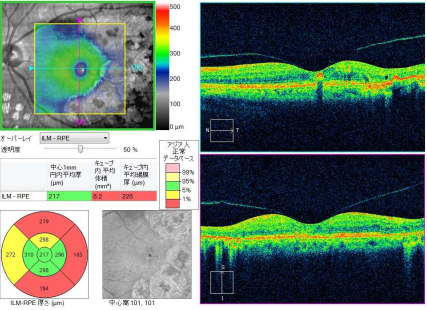

| 6 months  |   |
|-----------|---|
| BCVA      | - |
| Treatment | - |

| 7 months  |       |
|-----------|-------|
| BCVA      | 20/20 |
| Treatment | -     |

| Case   | Age range (years) | Sex  | Type of therapy | Lens status | History of vitrectomy |
|--------|-------------------|------|-----------------|-------------|-----------------------|
| Case 6 | 60s               | male | Treatment-naïve | phakic      | no                    |

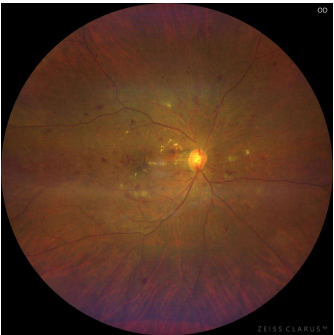

| Baseline  |       |
|-----------|-------|
| BCVA      | 20/80 |
| Treatment | IVF   |

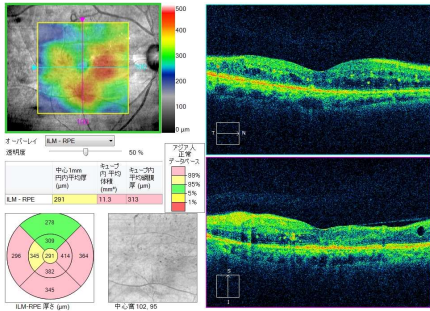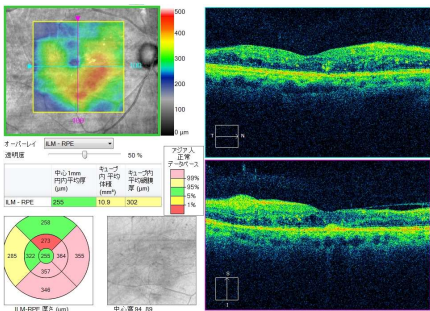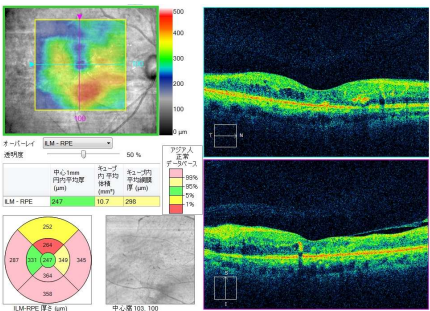

| 1 month   |       |
|-----------|-------|
| BCVA      | 20/80 |
| Treatment | -     |

| 2 months  |   |
|-----------|---|
| BCVA      | - |
| Treatment | - |

| 3 months  |   |
|-----------|---|
| BCVA      | - |
| Treatment | - |

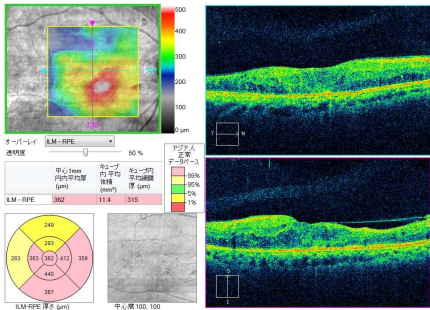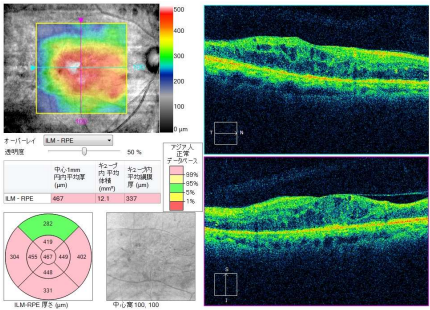

| 4 months  |   |
|-----------|---|
| BCVA      | - |
| Treatment | - |

| 5 months  |   |
|-----------|---|
| BCVA      | - |
| Treatment | - |

| 6 months  |       |
|-----------|-------|
| BCVA      | 20/80 |
| Treatment | -     |

| 7 months  |       |
|-----------|-------|
| BCVA      | 20/80 |
| Treatment | IVF   |

| Case   | Age range (years) | Sex  | Type of therapy | Lens status | History of vitrectomy |
|--------|-------------------|------|-----------------|-------------|-----------------------|
| Case 7 | 70s               | male | Treatment-naïve | IOL         | no                    |

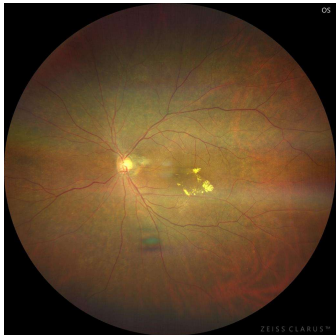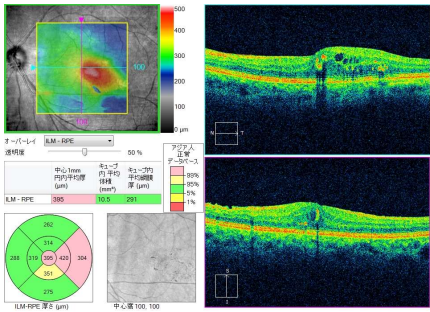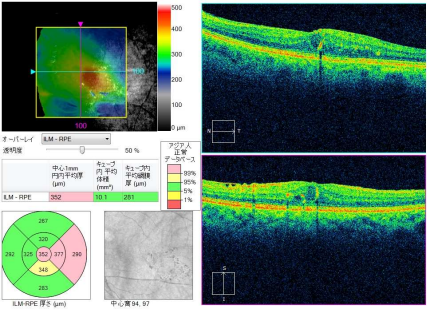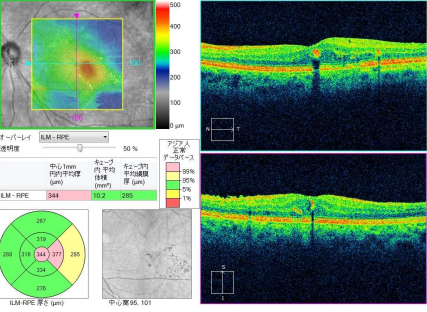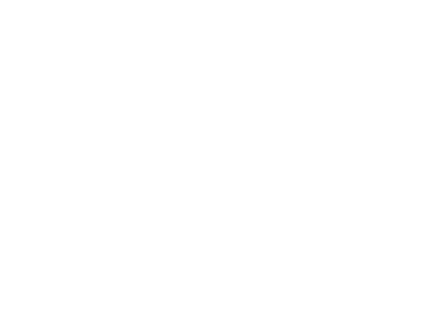

| Baseline  |       |
|-----------|-------|
| BCVA      | 20/20 |
| Treatment | IVF   |

| 1 month   |       |
|-----------|-------|
| BCVA      | 20/25 |
| Treatment | -     |

| 2 months  |       |
|-----------|-------|
| BCVA      | 20/20 |
| Treatment | -     |

| 3 months  |   |
|-----------|---|
| BCVA      | - |
| Treatment | - |

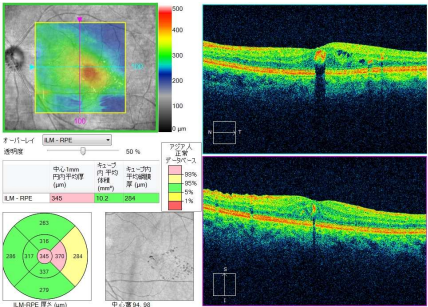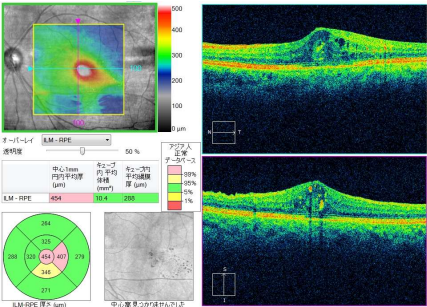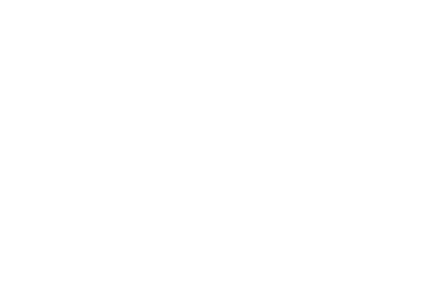

| 4 months  |       |
|-----------|-------|
| BCVA      | 20/20 |
| Treatment | -     |

| 5 months  |   |
|-----------|---|
| BCVA      | - |
| Treatment | - |

| 6 months  |       |
|-----------|-------|
| BCVA      | 20/25 |
| Treatment | -     |

| Case   | Age range (years) | Sex  | Type of therapy | Lens status | History of vitrectomy |
|--------|-------------------|------|-----------------|-------------|-----------------------|
| Case 8 | 60s               | male | Treatment-naïve | phakic      | no                    |

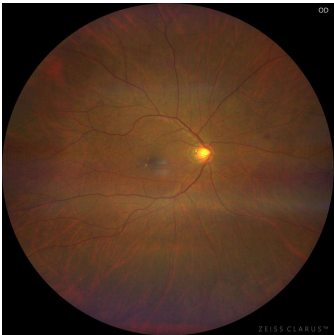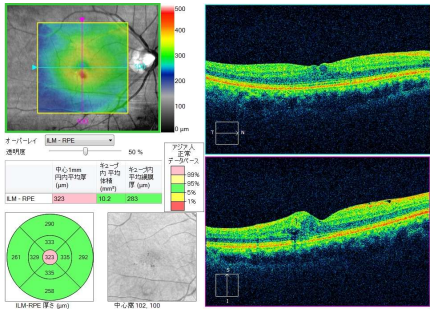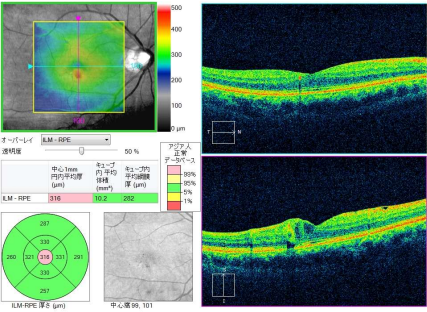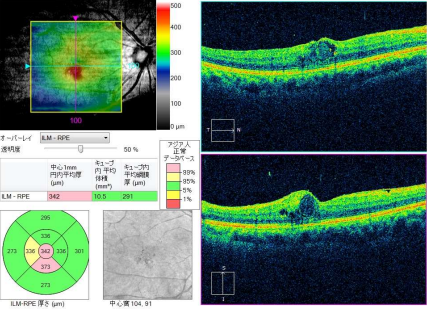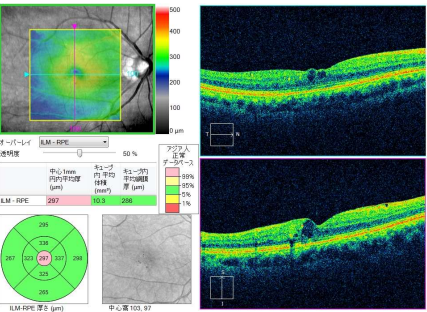

| Baseline  |       |
|-----------|-------|
| BCVA      | 20/20 |
| Treatment | IVF   |

| 1 month   |       |
|-----------|-------|
| BCVA      | 20/20 |
| Treatment | IVBr  |

| 2 months  |       |
|-----------|-------|
| BCVA      | 20/40 |
| Treatment | -     |

| 3 months  |       |
|-----------|-------|
| BCVA      | 20/20 |
| Treatment | -     |

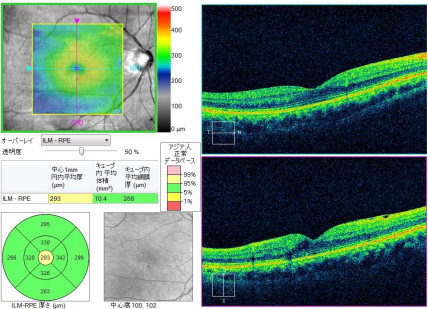

| 4 months  |       |
|-----------|-------|
| BCVA      | 20/20 |
| Treatment | -     |

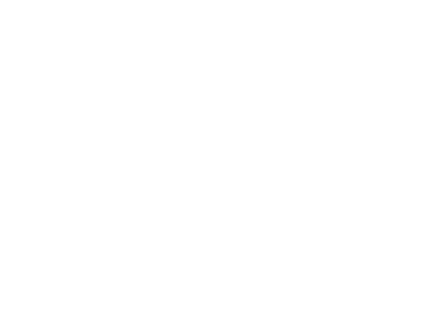

| 5 months  |   |
|-----------|---|
| BCVA      | - |
| Treatment | - |



| 6 months  |   |
|-----------|---|
| BCVA      | - |
| Treatment | - |

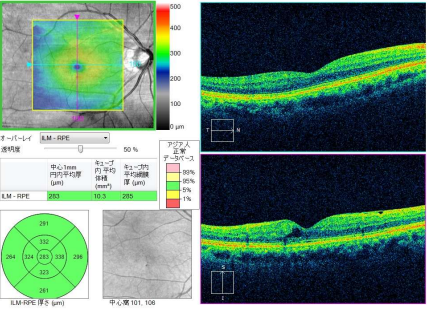

| 7 months  |       |
|-----------|-------|
| BCVA      | 20/20 |
| Treatment | -     |

| Case   | Age range (years) | Sex  | Type of therapy | Lens status | History of vitrectomy |
|--------|-------------------|------|-----------------|-------------|-----------------------|
| Case 9 | 70s               | male | Switch          | IOL         | no                    |

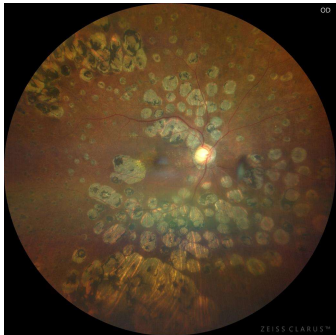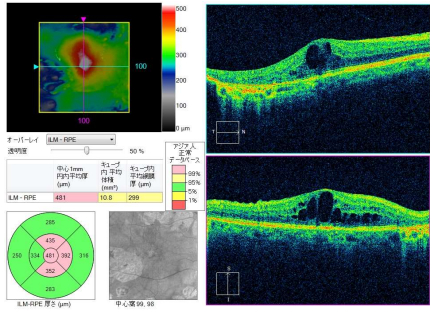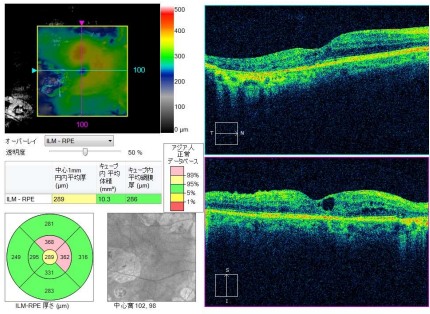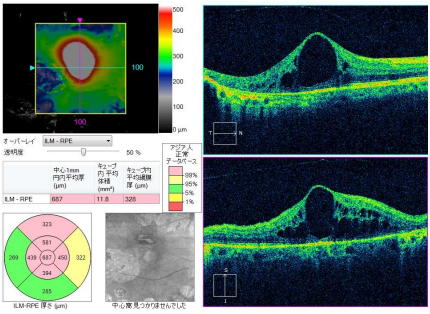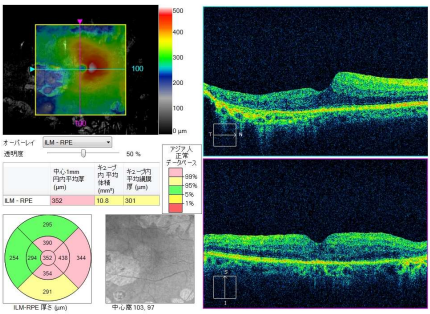

| Baseline  |       |
|-----------|-------|
| BCVA      | 20/80 |
| Treatment | IVF   |

| 1 month   |       |
|-----------|-------|
| BCVA      | 20/40 |
| Treatment | -     |

| 2 months  |       |
|-----------|-------|
| BCVA      | 20/40 |
| Treatment | PPV   |

| 3 months  |       |
|-----------|-------|
| BCVA      | 20/40 |
| Treatment | -     |

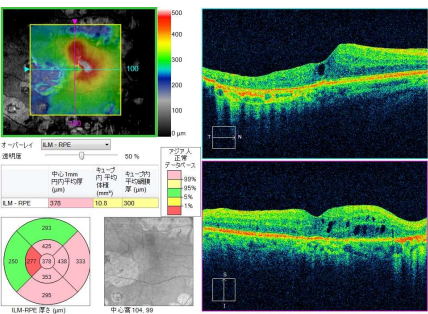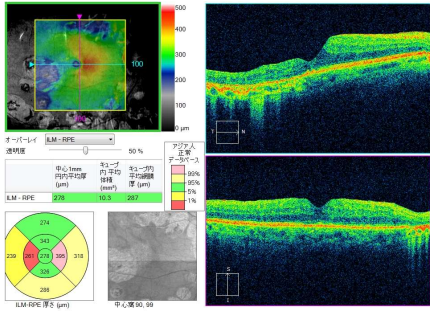

| 4 months  |       |
|-----------|-------|
| BCVA      | 20/80 |
| Treatment | -     |

| 5 months  |       |
|-----------|-------|
| BCVA      | 20/80 |
| Treatment | -     |

| Case    | Age range (years) | Sex    | Type of therapy | Lens status | History of vitrectomy |
|---------|-------------------|--------|-----------------|-------------|-----------------------|
| Case 10 | 60s               | female | Treatment-naïve | IOL         | yes                   |

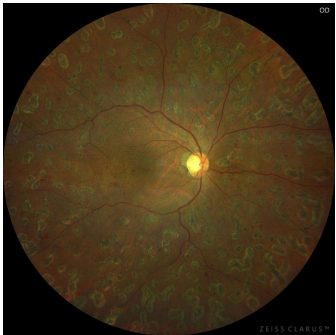

| Baseline  |        |
|-----------|--------|
| BCVA      | 20/100 |
| Treatment | IVF    |

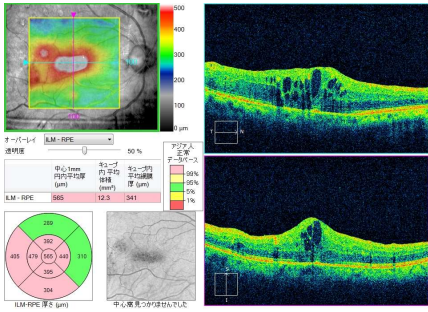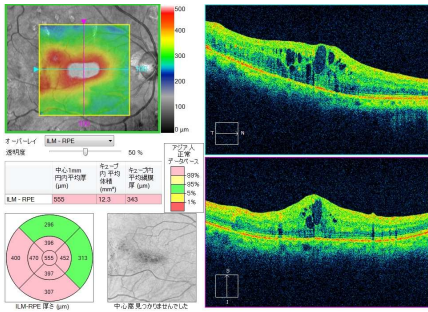

| 1 month   |       |
|-----------|-------|
| BCVA      | 20/50 |
| Treatment | IVF   |

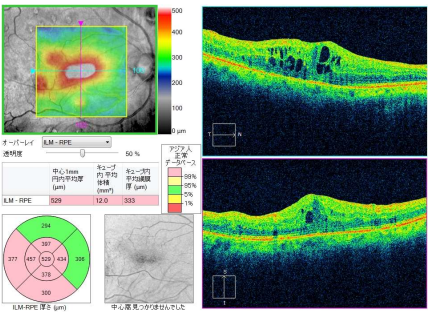

| 2 months  |      |
|-----------|------|
| BCVA      | -    |
| Treatment | STTA |

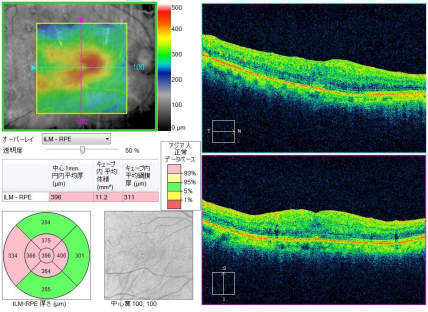

| 3 months  |       |
|-----------|-------|
| BCVA      | 20/80 |
| Treatment | -     |

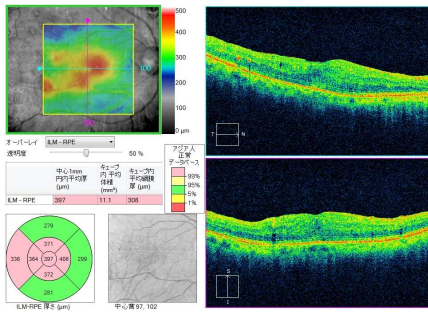

| 4 months  |       |
|-----------|-------|
| BCVA      | 20/40 |
| Treatment | -     |

| 5 months  |       |
|-----------|-------|
| BCVA      | 20/40 |
| Treatment | -     |

| Case    | Age range (years) | Sex    | Type of therapy | Lens status | History of vitrectomy |
|---------|-------------------|--------|-----------------|-------------|-----------------------|
| Case 11 | 70s               | female | Switch          | IOL         | no                    |

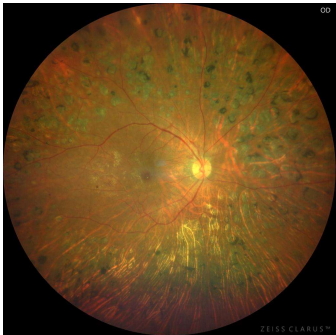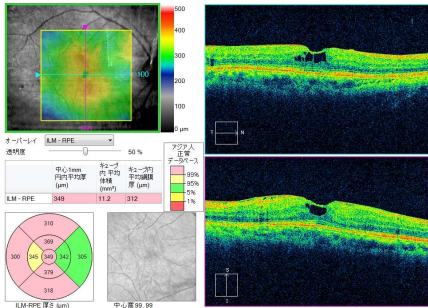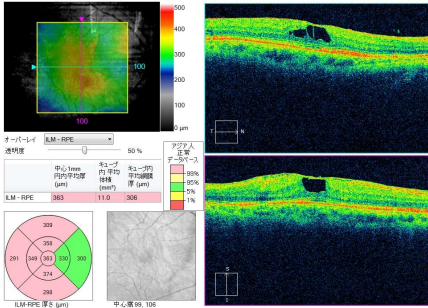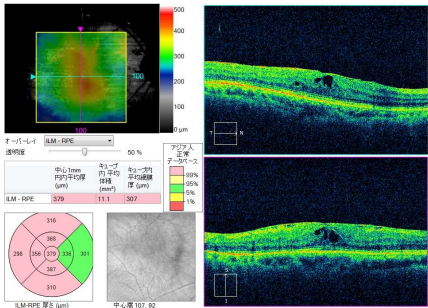

| Baseline  |       |
|-----------|-------|
| BCVA      | 20/25 |
| Treatment | IVF   |

| 1 month   |       |
|-----------|-------|
| BCVA      | 20/25 |
| Treatment | -     |

| 2 months  |       |
|-----------|-------|
| BCVA      | 20/25 |
| Treatment | STTA  |

| 3 months  |       |
|-----------|-------|
| BCVA      | 20/25 |
| Treatment | PPV   |

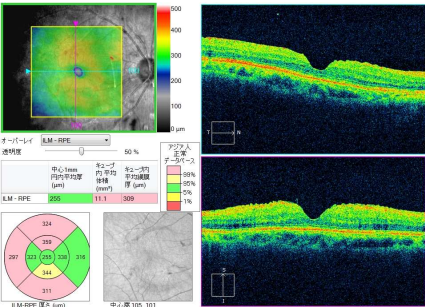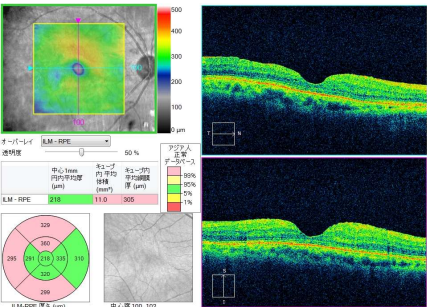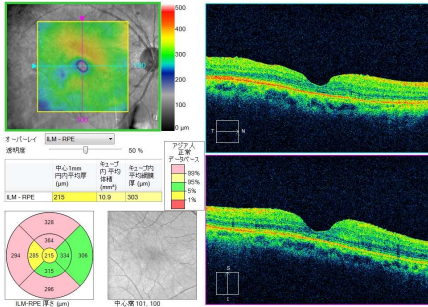

| 4 months  |       |
|-----------|-------|
| BCVA      | 20/25 |
| Treatment | -     |

| 5 months  |   |
|-----------|---|
| BCVA      | - |
| Treatment | - |

| 6 months  |       |
|-----------|-------|
| BCVA      | 20/25 |
| Treatment | STTA  |

| 7 months  |       |
|-----------|-------|
| BCVA      | 20/25 |
| Treatment | -     |

| Case    | Age range (years) | Sex  | Type of therapy | Lens status | History of vitrectomy |
|---------|-------------------|------|-----------------|-------------|-----------------------|
| Case 12 | 80s               | male | Treatment-naïve | IOL         | yes                   |

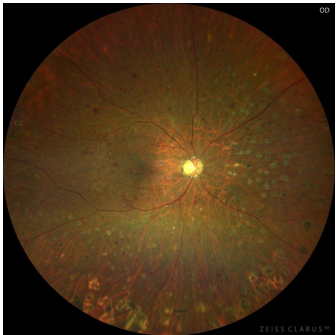

| Baseline  |       |
|-----------|-------|
| BCVA      | 20/40 |
| Treatment | IVF   |

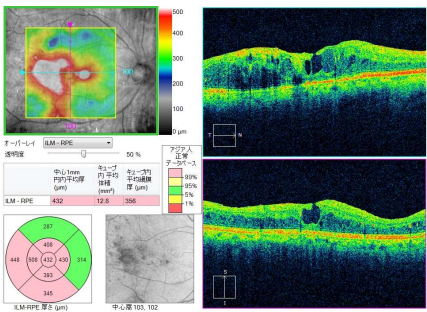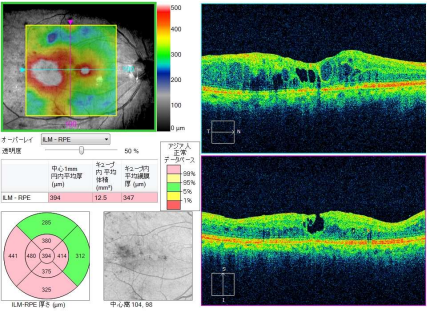

| 1 month   |       |
|-----------|-------|
| BCVA      | 20/40 |
| Treatment | IVF   |

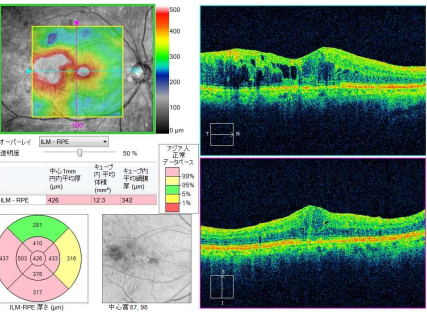

| 2 months  |       |
|-----------|-------|
| BCVA      | 20/40 |
| Treatment | IVF   |

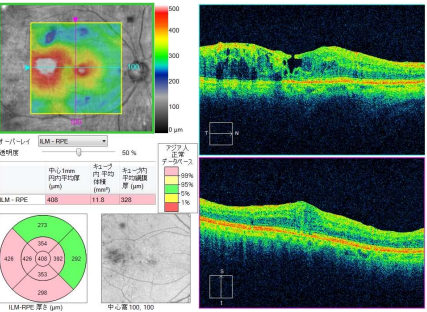

| 3 months  |       |
|-----------|-------|
| BCVA      | 20/40 |
| Treatment | -     |

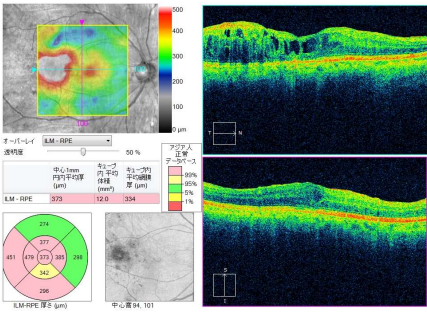

| 4 months  |   |
|-----------|---|
| BCVA      | - |
| Treatment | - |

| 5 months  |       |
|-----------|-------|
| BCVA      | 20/40 |
| Treatment | -     |

| Case    | Age range (years) | Sex  | Type of therapy | Lens status | History of vitrectomy |
|---------|-------------------|------|-----------------|-------------|-----------------------|
| Case 13 | 70s               | male | Switch          | IOL         | yes                   |

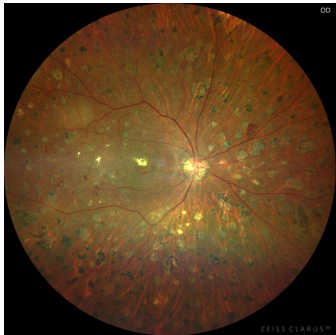

| Baseline  |       |
|-----------|-------|
| BCVA      | 20/40 |
| Treatment | IVF   |

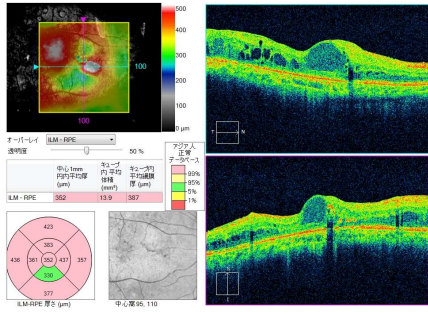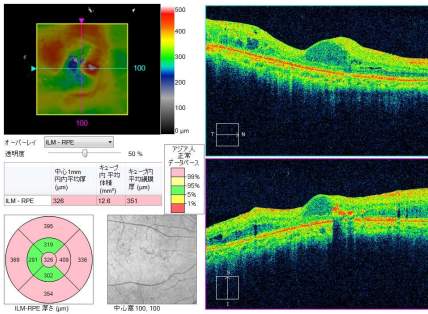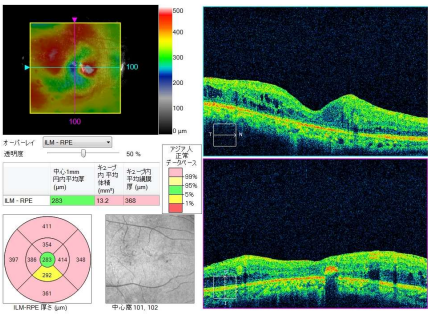

| 1 month   |       |
|-----------|-------|
| BCVA      | 20/40 |
| Treatment | -     |

| 2 months  |   |
|-----------|---|
| BCVA      | - |
| Treatment | - |

| 3 months  |       |
|-----------|-------|
| BCVA      | 20/40 |
| Treatment | -     |

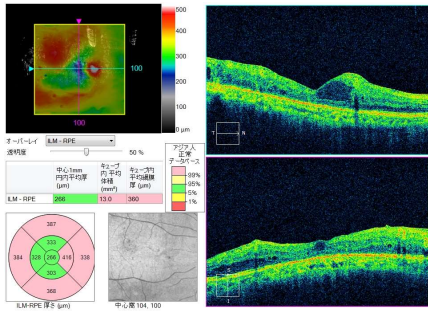

| 4 months  |   |
|-----------|---|
| BCVA      | - |
| Treatment | - |

| 5 months  |       |
|-----------|-------|
| BCVA      | 20/50 |
| Treatment | -     |

| Case    | Age range (years) | Sex    | Type of therapy | Lens status | History of vitrectomy |
|---------|-------------------|--------|-----------------|-------------|-----------------------|
| Case 14 | 60s               | female | Switch          | IOL         | no                    |

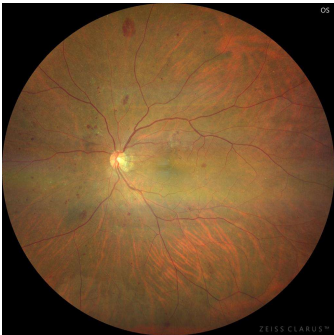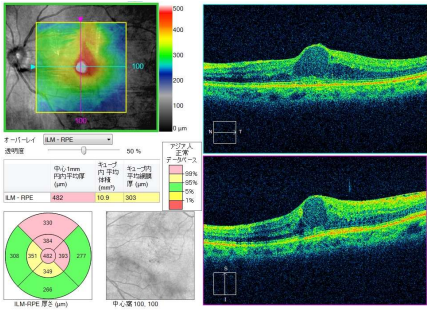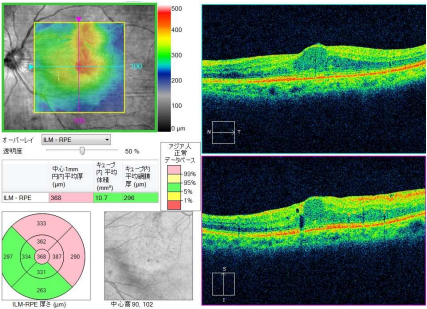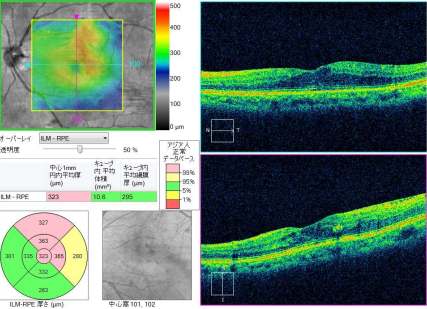

| Baseline  |       |
|-----------|-------|
| BCVA      | 20/40 |
| Treatment | IVF   |

| 1 month   |       |
|-----------|-------|
| BCVA      | 20/32 |
| Treatment | -     |

| 2 months  |       |
|-----------|-------|
| BCVA      | 20/32 |
| Treatment | -     |

| 3 months  |   |
|-----------|---|
| BCVA      | - |
| Treatment | - |

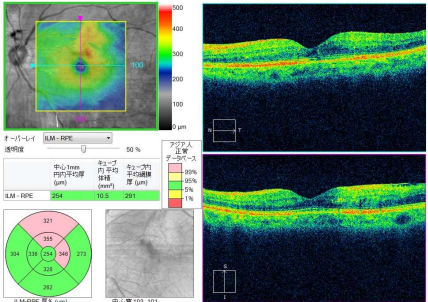

| 4 months  |       |
|-----------|-------|
| BCVA      | 20/20 |
| Treatment | -     |

| Case    | Age range (years) | Sex  | Type of therapy | Lens status | History of vitrectomy |
|---------|-------------------|------|-----------------|-------------|-----------------------|
| Case 15 | 60s               | male | Treatment-naïve | phakic      | no                    |

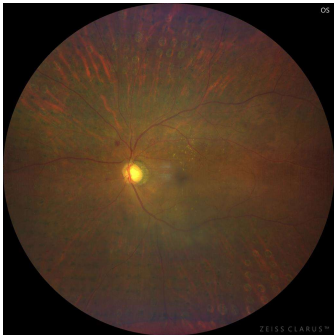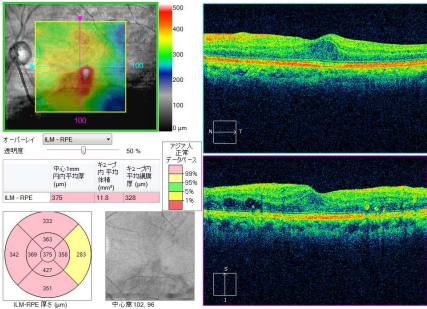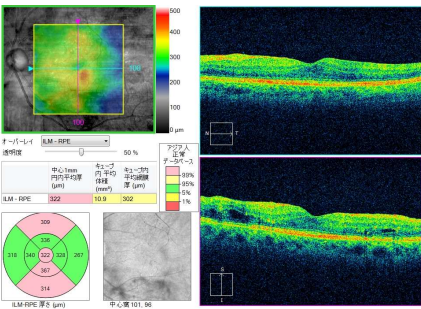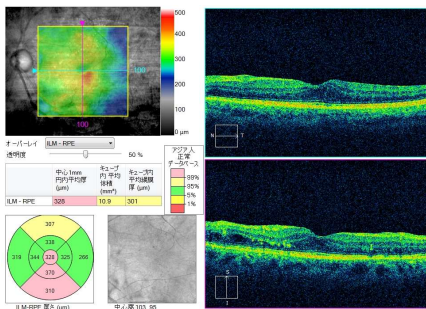

| Baseline  |       |
|-----------|-------|
| BCVA      | 20/25 |
| Treatment | IVF   |

| 1 month   |       |
|-----------|-------|
| BCVA      | 20/25 |
| Treatment | -     |

| 2 months  |       |
|-----------|-------|
| BCVA      | 20/20 |
| Treatment | -     |

| 3 months  |   |
|-----------|---|
| BCVA      | - |
| Treatment | - |

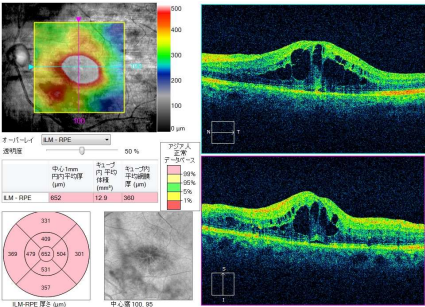

| 4 months  |        |
|-----------|--------|
| BCVA      | 20/100 |
| Treatment | -      |

| Case    | Age range (years) | Sex  | Type of therapy | Lens status | History of vitrectomy |
|---------|-------------------|------|-----------------|-------------|-----------------------|
| Case 16 | 60s               | male | Treatment-naïve | phakic      | no                    |

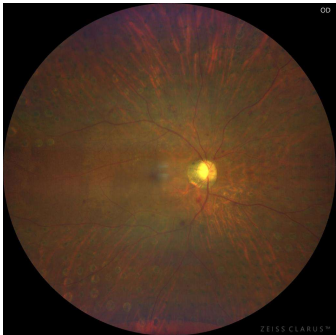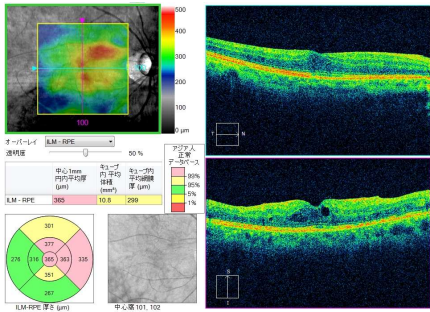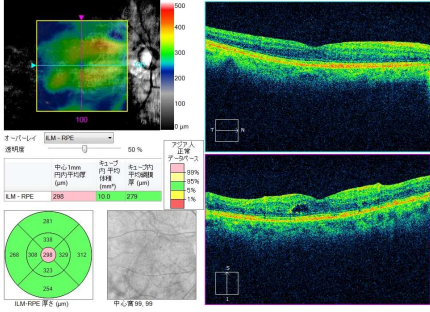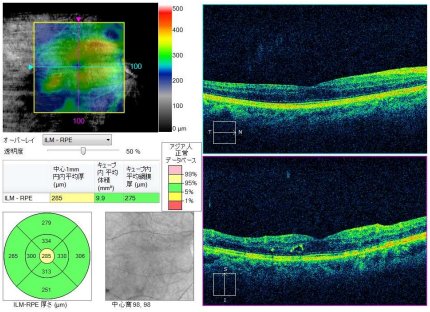

| Baseline  |       |
|-----------|-------|
| BCVA      | 20/40 |
| Treatment | IVF   |

| 1 month   |       |
|-----------|-------|
| BCVA      | 20/25 |
| Treatment | -     |

| 2 months  |       |
|-----------|-------|
| BCVA      | 20/20 |
| Treatment | -     |

| 3 months  |   |
|-----------|---|
| BCVA      | - |
| Treatment | - |

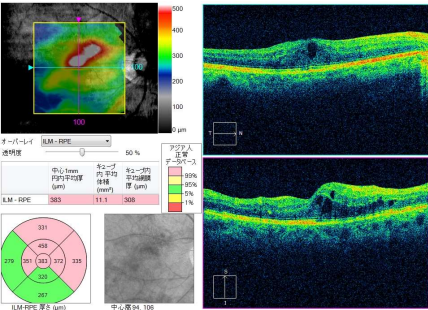

| 4 months  |       |
|-----------|-------|
| BCVA      | 20/20 |
| Treatment | IVF   |

| Case    | Age range (years) | Sex  | Type of therapy | Lens status | History of vitrectomy |
|---------|-------------------|------|-----------------|-------------|-----------------------|
| Case 17 | 70s               | male | Treatment-naïve | phakic      | no                    |

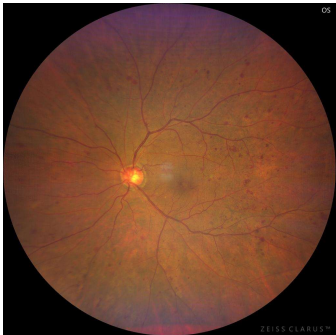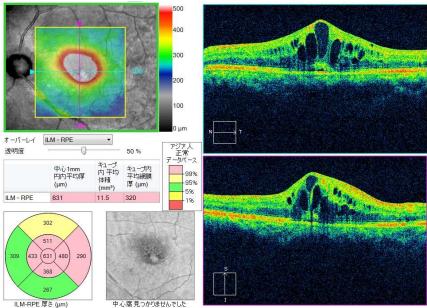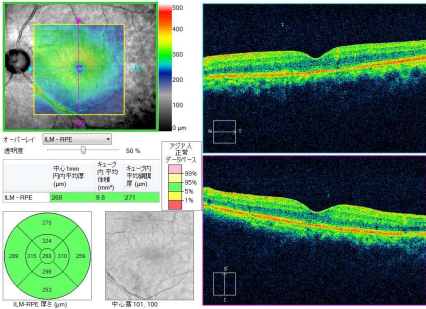

| Baseline  |       |
|-----------|-------|
| BCVA      | 20/20 |
| Treatment | IVF   |

| 1 month   |       |
|-----------|-------|
| BCVA      | 20/16 |
| Treatment | -     |

| 2 months  |   |
|-----------|---|
| BCVA      | - |
| Treatment | - |

| 3 months  |       |
|-----------|-------|
| BCVA      | 20/20 |
| Treatment | -     |

| Case    | Age range (years) | Sex  | Type of therapy | Lens status | History of vitrectomy |
|---------|-------------------|------|-----------------|-------------|-----------------------|
| Case 18 | 50s               | male | Switch          | IOL         | yes                   |

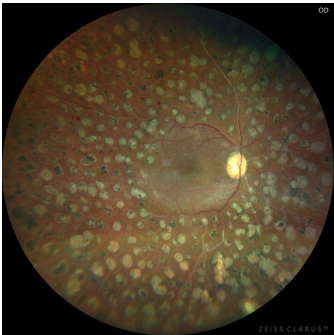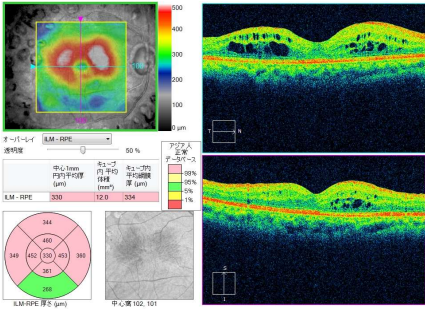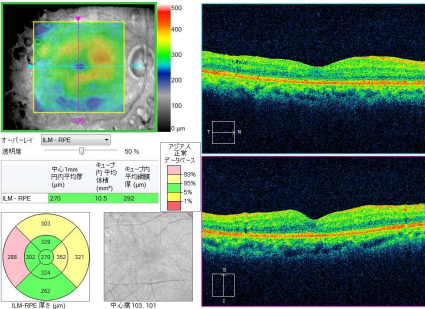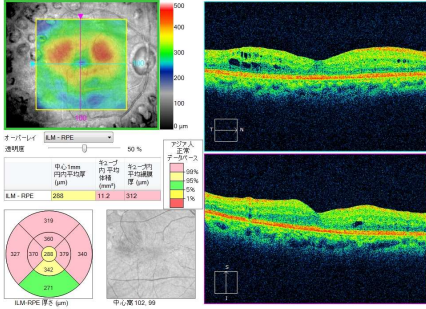

| Baseline  |       |
|-----------|-------|
| BCVA      | 20/20 |
| Treatment | IVF   |

| 1 month   |       |
|-----------|-------|
| BCVA      | 20/20 |
| Treatment | -     |

| 2 months  |   |
|-----------|---|
| BCVA      | - |
| Treatment | - |

| 3 months  |       |
|-----------|-------|
| BCVA      | 20/20 |
| Treatment | IVF   |

| Case    | Age range (years) | Sex  | Type of therapy | Lens status | History of vitrectomy |
|---------|-------------------|------|-----------------|-------------|-----------------------|
| Case 19 | 70s               | male | Switch          | IOL         | no                    |

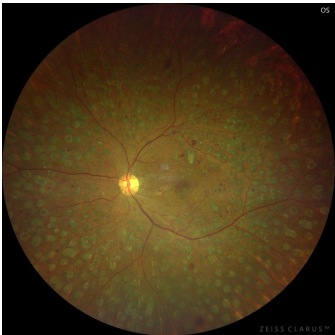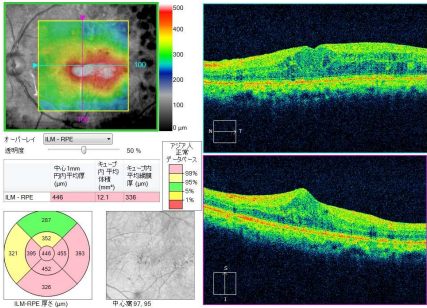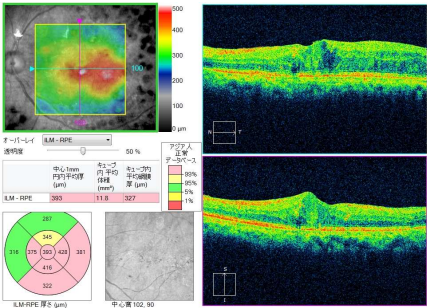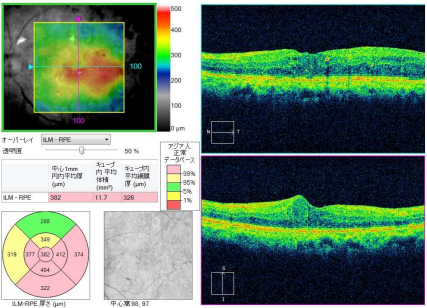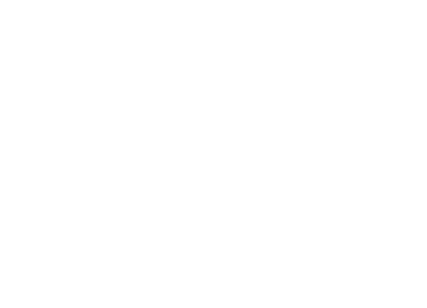

| Baseline  |       |
|-----------|-------|
| BCVA      | 20/80 |
| Treatment | IVF   |

| 1 month   |       |
|-----------|-------|
| BCVA      | 20/80 |
| Treatment | IVF   |

| 2 months  |       |
|-----------|-------|
| BCVA      | 20/80 |
| Treatment | IVF   |

| 3 months  |   |
|-----------|---|
| BCVA      | - |
| Treatment | - |

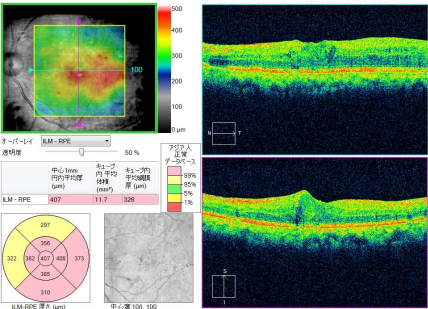

| 4 months  |       |
|-----------|-------|
| BCVA      | 20/80 |
| Treatment | -     |

| Case    | Age range (years) | Sex    | Type of therapy | Lens status | History of vitrectomy |
|---------|-------------------|--------|-----------------|-------------|-----------------------|
| Case 20 | 50s               | female | Treatment-naïve | phakic      | no                    |

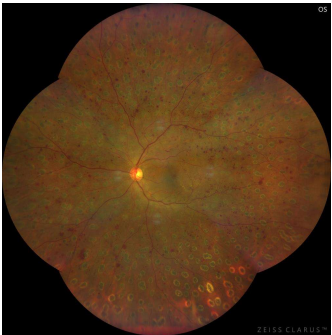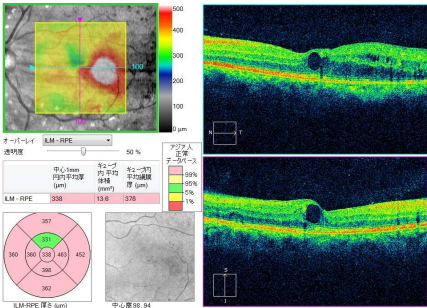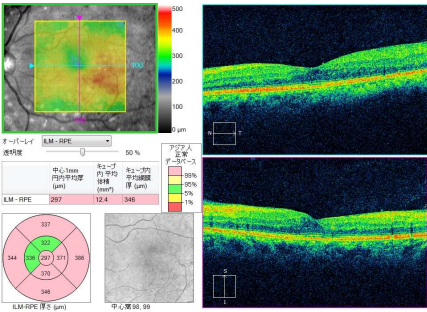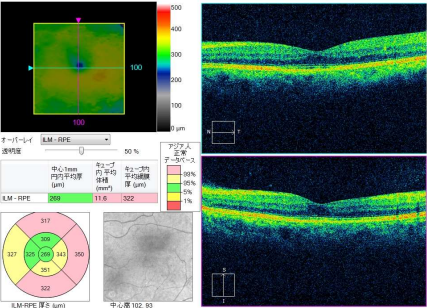

| Baseline  |       |
|-----------|-------|
| BCVA      | 20/32 |
| Treatment | IVF   |

| 1 month   |       |
|-----------|-------|
| BCVA      | 20/25 |
| Treatment | -     |

| 2 months  |   |
|-----------|---|
| BCVA      | - |
| Treatment | - |

| 3 months  |       |
|-----------|-------|
| BCVA      | 20/20 |
| Treatment | -     |

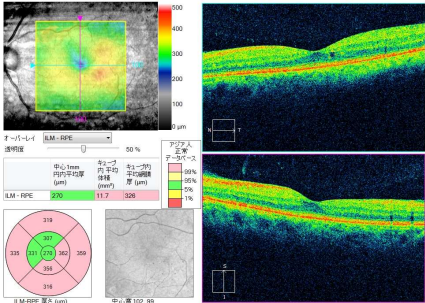

| 4 months  |       |
|-----------|-------|
| BCVA      | 20/20 |
| Treatment | -     |

| Case    | Age range (years) | Sex  | Type of therapy | Lens status | History of vitrectomy |
|---------|-------------------|------|-----------------|-------------|-----------------------|
| Case 21 | 70s               | male | Treatment-naïve | IOL         | yes                   |

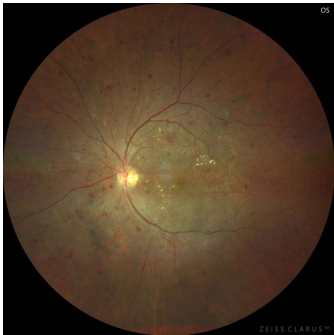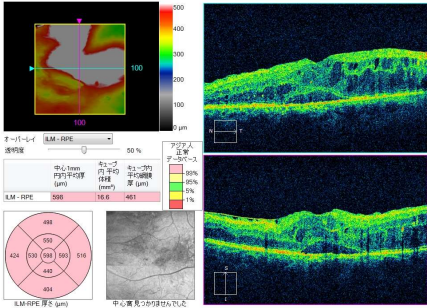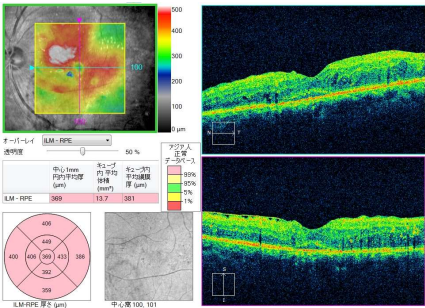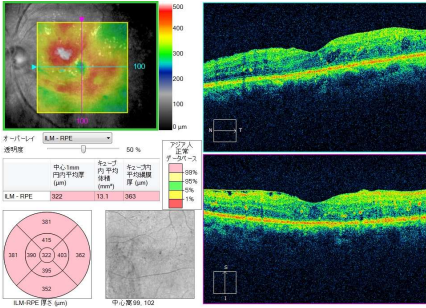

| Baseline  |       |
|-----------|-------|
| BCVA      | 20/40 |
| Treatment | IVF   |

| 1 month   |       |
|-----------|-------|
| BCVA      | 20/40 |
| Treatment | -     |

| 2 months  |       |
|-----------|-------|
| BCVA      | 20/32 |
| Treatment | -     |
